# Supplementary material
Source: Springer Nature journal article supplement (https://www.springermedizin.de/resource/supplementary/13045_2013_322_MOESM5_ESM.pdf/9661106)
Supplement: MOESM5 [file 9661106]

**Figure 3. Progression Free Survival according to type of treatments**

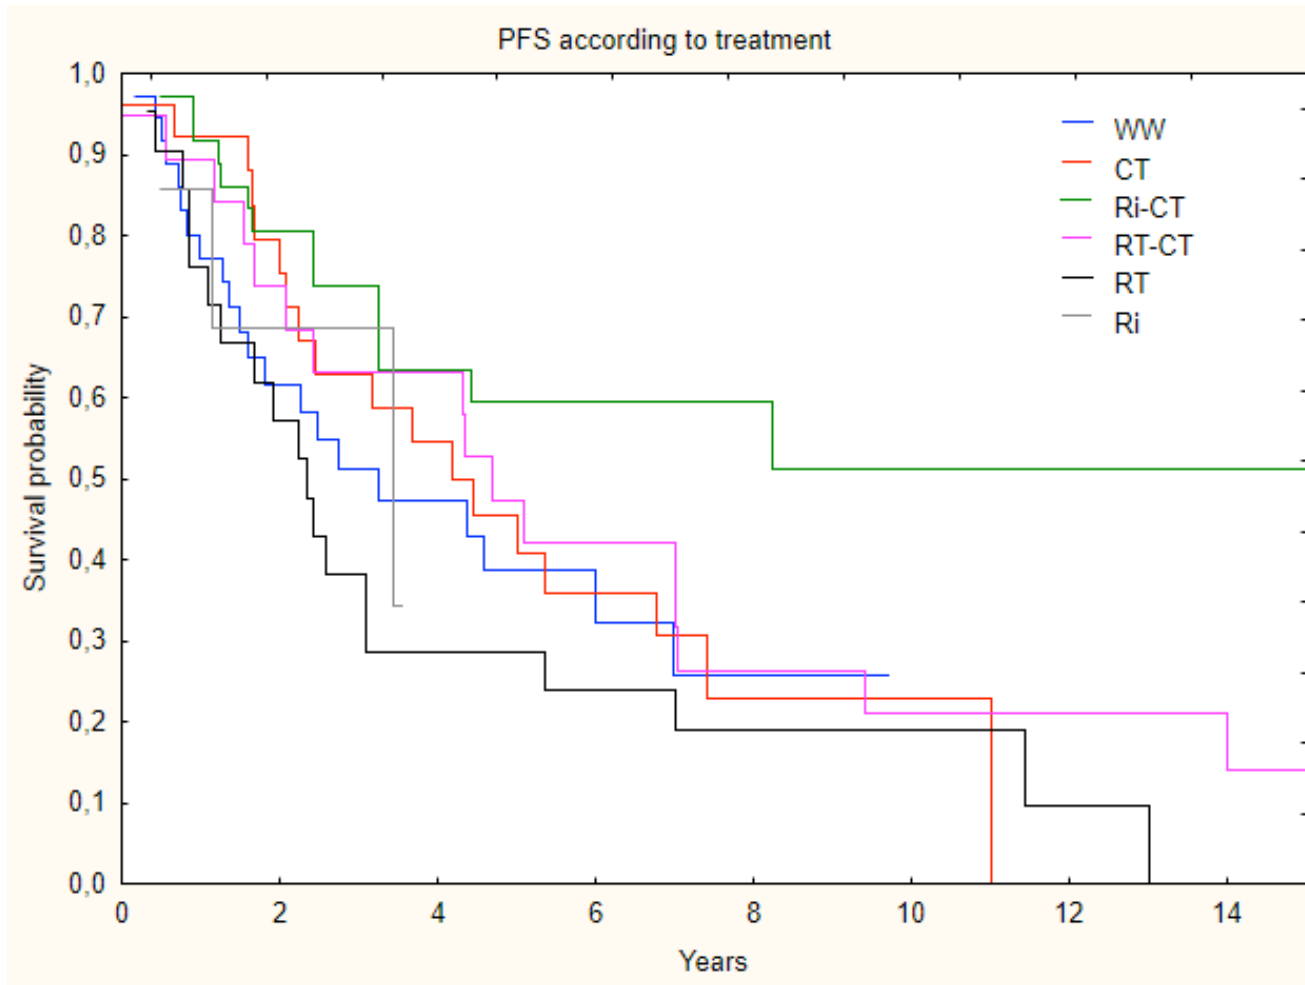

WW: watch and wait, Ri-CT: rituximab + chemotherapy ; RT: radiotherapy; RT-CT: radiotherapy+ chemotherapy; CT: chemotherapy alone; Ri: immunotherapy alone.
